# Supplementary material
Source: ML conference proceedings conference paper supplement (https://proceedings.mlr.press/v37/wua15.html)
Supplement: Supplementary file 1 [file wua15-supp.pdf]

---

## An Online Learning Algorithm for Bilinear Models (Supplementary)

---

**Yuanbin Wu**  
**Shiliang Sun**

YBWU@CS.ECNU.EDU.CN  
SLSUN@CS.ECNU.EDU.CN

Shanghai Key Laboratory of Multidimensional Information Processing  
Department of Computer Science and Technology, East China Normal University

### Details of Algorithm 2

Several technical notes on power iteration are about  $\|\alpha_t\|$ ,  $\|\beta_t\|$  and  $\sigma_1$ .

First, when the iteration stops,  $\bar{\alpha}_t^{(\tau)}$ ,  $\bar{\beta}_t^{(\tau)}$  may not have unit length. To normalize them, we also need to compute their norms. Observing that

$$\|\alpha_t\|^2 = \|\alpha_{t-1}\|^2 + 2\langle\alpha_{t-1}, \Delta\alpha_t^{(\tau)}\rangle + \|\Delta\alpha_t^{(\tau)}\|^2,$$

and the last two terms only involve manipulations on sparse vectors, we can maintain the norms efficiently.

Second, it is also possible to avoid explicit normalization  $\frac{\alpha_t^{(\tau)}}{\|\alpha_t^{(\tau)}\|}$  by further refining update equations (9)-(12) with  $\|\alpha_{t-1}\|$ ,  $\|\beta_{t-1}\|$  involved.

$$\Delta\alpha^{(\tau)} = \frac{\|\alpha_{t-1}\|}{\sigma_1\|\beta_{t-1}\|} \left( C(\Delta\Phi^t)\beta_{t-1} + \Theta_t\Delta\beta^{(\tau-1)} \right), \quad (1)$$

$$\bar{\alpha}_t^{(\tau)} = \alpha_{t-1} + \Delta\alpha^{(\tau)}, \quad (2)$$

$$\Delta\beta^{(\tau)} = \frac{\|\beta_{t-1}\|}{\sigma_1\|\alpha_{t-1}\|} \left( C(\Delta\Phi^t)^\top\alpha_{t-1} + \Theta_t^\top\Delta\alpha^{(\tau)} \right), \quad (3)$$

$$\bar{\beta}_t^{(\tau)} = \beta_{t-1} + \Delta\beta^{(\tau)}. \quad (4)$$

When the power iteration stops, we can simply set  $\alpha_t, \beta_t$  as follows (without explicit normalization):

$$\begin{aligned} \alpha_t &= \alpha_{t-1} + \Delta\alpha^{(R)}, \\ \beta_t &= \beta_{t-1} + \Delta\beta^{(R)}. \end{aligned}$$

Finally, for  $\sigma_1$ , simple algebra manipulations gives the updates:

$$\sigma_1^t = \frac{1}{\|\alpha_t\|\|\beta_t\|} \left( \sigma_1^{t-1}\|\alpha_{t-1}\|\|\beta_{t-1}\| + C\beta_{t-1}^\top\Delta\Phi\alpha_{t-1} + \Delta\beta^\top\Theta_t\alpha_{t-1} + \beta_{t-1}^\top\Theta_t\Delta\alpha + \Delta\beta^\top\Theta_t\Delta\alpha \right).$$
